# Supplementary material for: Social inclusion in the Irish health context: Policy and stakeholder mapping
Source: Springer Nature journal article supplement (doi:10.1007/s11845-019-02060-1), 2019-07-13
Supplement: MOESM1 [file 16926990]

Additional File 1: Policy & Initiatives in SI

| General Area | Policy/Initiative Name | Original Govt Department or Body | Brief Explanation | Year Published | Timescale | Mention of Social Inclusion (SI) or Social Exclusion (SE) | Reference to NAP Inclusion |
| --- | --- | --- | --- | --- | --- | --- | --- |
| Social Inclusion | National Action Plan for Social Inclusion (NAP Inclusion) | Social and Family Affairs | Sets out national strategy for social inclusion (SI) based on lifecycle approach, complemented by SI elements of the National Development Plan 2007-2013, details actions to fulfil goals of SI strategy. | 2007 | 2007-2016 | throughout | n/a |
| Social Inclusion | Updated National Action Plan for Social Inclusion | Social Protection | Update of NAP Inclusion in view of recession and large political and social changes; “certain NAP Inclusion goals and actions became out of date or less relevant". | 2016 | 2015-2017 | throughout | n/a |
| Social Inclusion | National Social Reporting 2016 Ireland | Social Protection | Summary of national progress in addressing overarching objectives of EU Open Method of Coordination in the areas SI, pensions, health and long-term care. | 2016 |  | mentions SI Forum, NAP inclusion, SICAP and child poverty | yes |
| Social Inclusion | Social Inclusion Monitor | Social Protection | Official report to EU on progress towards national target for poverty reduction, also presents information on supporting indicators of poverty and social exclusion (SE). | 2015 |  | throughout | yes |
| Social Inclusion | Social Inclusion Forum | Social Protection | Setting for wider public consultation and discussion on SI issues between government departments, community and voluntary sector and people experiencing poverty or SE. | 2017 |  | n/a | yes |
| Employment & Work | Pathways to Work | Government of Ireland | Policy aiming to ensure as many jobs as possible go to people who are unemployed. | 2016 | 2016-2020 | mentions SICAP | no |
| Employment & Work | Action Plan for Jobs | Government of Ireland | Policy on job creation that identifies specific actions and names specific government departments and timelines for each action. | 2017 |  | mentions SICAP and SI of young people | no |
| Employment & Work | Comprehensive Employment Strategy for People with Disabilities | Government of Ireland | Coordinated approach to enable persons with disabilities to gain employment; details specific actions and names relevant government departments and agencies responsible. | 2015 | 2015-2024 | mentions employment and SI | no |
| Employment & Work | Make Work Pay for People With Disabilities - Report to Government | Social Protection | Report looking at balance between the benefit system, additional costs of work associated with having disability, and net income gains if employed, seeks to devise solutions to difficulties identified. | 2017 |  | mentions employment as way of attaining SI | no |
| Justice & Equality | National Strategy for Women and Girls - Creating a better society for all | Justice & Equality | Sets out goals of creating a country where “all women enjoy equality with men and can achieve their full potential, while enjoying a safe and fulfilling life”. | 2017 | 2017-2020 | mentions acting on poverty and SI under NAP inclusion goals, HSE SI office and mentions SICAP | yes |
| Justice & Equality | Migrant Integration Strategy - A blueprint for the future | Justice & Equality | Sets out govt. plans for promoting integration in context of increasing diversity of population, seeks to ensure barriers to full participation in Irish society by migrants are identified and addressed. | 2017 | 2017-2020 | mentions measures across Govt to improve SI | no |
| Justice & Equality | National Traveller and Roma Inclusion Strategy | Justice & Equality | Sets out plans to ensure barriers to full participation in Irish society by Traveller and Roma people are identified and addressed. | 2017 | 2017-2021 | mentions SICAP and HSE SI office initiatives | no |
| Justice & Equality | National Disability Inclusion Strategy | Justice & Equality | Details plans for improving lives of people with disabilities in practical sense, and in creating opportunities for people with disabilities to fulfil their potential. | 2017 | 2017-2021 | quotes SI Monitor 2015 | no |
| Justice & Equality | Second National Strategy on Domestic, Sexual and Gender-Based Violence | Justice & Equality | Aims to (1) change societal attitudes to support a reduction in domestic and sexual violence, (2) improve supports available to victims and survivors, and (3) hold perpetrators to account in order to create a safer Ireland. | 2016 | 2016-2021 | mentions reviewing how HSE services approach this issue | no |
| Justice & Equality | Joint Irish Prison Service & Probation Service Strategic Plan | Irish Prison Service & Probation Service | Describes multiagency approach to management of offenders and rehabilitation in order to try to reduce reoffending and improve outcomes for prisoners. | 2015 | 2015-2017 | mentions SI as goal in particular for women, Travellers and those aged 18-21 years | no |
| Health | Healthy Ireland - A Framework for Improved Health and Wellbeing 2013-2025 | Health | Goals are to (1) increase proportion of people who are healthy at all stages of life, (2) reduce health inequalities, (3) protect the public from threats to health and wellbeing, and (4) create environment where every individual and sector of society can play their part in achieving healthy Ireland. | 2013 | 2013-2025 | Cabinet Committee on Social Policy will oversee implementation, work with SI Unit in Dept Social Protection to facilitate development of Social Impact Assessment, mentions EU and international linkages in SI related research | yes |
| Health | Reducing Harm, Supporting Recovery - A health-led response to drug and alcohol use in Ireland 2017-2025 | Health | Details govt. response to drug and alcohol use in Ireland, goals are to (1) promote and protect health and wellbeing, (2) minimise harm caused by misuse of substances and promote recovery, (3) address harms of drug markets and reduce access to drugs, (4) support participation of individuals, families and communities, and (5) develop comprehensive evidence-informed policies and actions. | 2017 | 2017-2025 | mentions SICAP as lever for preventing early school leaving and signposting training opportunities | yes |
| Health | A Vision for Change - Report of the Expert Group on Mental Health Policy | Health | Sets out plan for model of mental health service provision, describes framework for building and fostering positive mental health across entire community and for providing accessible, community-based, specialist services for people with mental illness. | 2006 | 2006-2016 | chapter 4 is about SI and mental illness, sets out actions to tackle SE - poverty, employment, education, housing, access to services etc., sets out links with SI services that existed at the time | yes |
| Health | Connecting for Life - Ireland’s National Strategy to Reduce Suicide 2015-2020 | Health, HSE | Aims to (1) allow for better understanding of suicidal behaviour, (2) support communities to prevent and respond to suicidal behaviour, (3) implement targeted approaches for those vulnerable to suicide, (4) improve access, consistency and integration of services, (5) develop safe and high quality services, (6) reduce access to means, and (7) create better data and research. | 2015 | 2015-2020 | defines SE, submissions from HSE SI incorporated into document, mentions Dept SP policies & NAP SI efforts to reduce SE | yes |
| Health | National Intercultural Health Strategy | HSE | Makes recommendations for health service improvements relating to improving access, adapting service delivery, health service organisation and future research. | 2008 | 2007-2012 | mentions important role SI unit HSE will play in advising on implementation and adapting services | yes |
| Health | Positive Ageing Starts Now! - The National Positive Ageing Strategy | Health | Goals are to (1) remove barriers to participation and provide opportunities for involvement in cultural, economic and social life in communities, (2) support people to maintain, improve or manage health, (3) enable people to age at home with confidence, security and dignity, and (4) support and use research to inform policy. | 2013 |  | chapter on promoting inclusion, | yes |
| Health | Primary Care - A New Direction | Health | Sets out planned changes to make primary care central focus of delivery of health and personal social services in Ireland, promotes team-based approach to service provision. | 2001 |  | says primary care team development will promote SI using proactive measures to ensure vulnerable individuals and groups are registered | no |
| Health | National Sexual Health Strategy | Health | Aims to provide (1) comprehensive, age-appropriate sexual health information and access to services, (2) equitable, accessible and high quality sexual health services, targeted to needs, available to everyone, and (3) high quality sexual health information for policy, practice, service planning and monitoring. | 2015 | 2015-2020 | reps from SI unit Dept Health involved in drafting | no |
| Health | Planning for Health - Trends and Priorities to inform Health Service Planning 2017 | HSE | Provides population focused analysis of current and future needs and demands on health service, aims to provide comprehensive overview of imminent demographic pressures up to 2022. | 2017 | 2017-2022 | SI mentioned under primary care and prominent throughout, mentions specifically health of homeless, those with addiction, migrants and Travellers | no |
| Health | Better Health, Improving Healthcare | Health | Briefing document prepared by Dept Health for incoming Minister, sets out considerations to inform development of clear and coherent agenda for action to improve the health service. | 2016 |  | discusses SI measures for use against health inequalities | no |
| Health | Tackling Chronic Disease - Policy Framework for Management of Chronic Diseases | Health | Seeks to addresses challenges of chronic disease so as to reduce the burden for individuals, carers and health system, underlines the importance of intersectoral activities on adverse lifestyle factors that contribute to chronic disease | 2008 |  | mentions all health actions will be reported on at senior officials group on SI and report to govt. through Cabinet Committee on SI | no |
| Health | The Path to Universal Healthcare - White Paper on Universal Health Insurance | Health | Set out plans to make health insurance mandatory, giving individuals access to standard basket of primary services, founded on principles of social solidarity. | 2014 |  | sets out where SI health services would sit related to basic package of services | no |
| Health | National Hepatitis C Strategy | HSE | Framework for coordinated response to Hep C in Ireland; lays out clear plan with timelines to reduce transmission and improve care of patients infected with Hep C. | 2012 | 2011-2014 | published by HSE SI office, mentions provision of interpreting and education of service providers | no |
| Health | HSE National Service Plan 2017 | HSE | Sets out type and volume of health and personal social services to be provided by HSE in 2017 | 2017 |  | sets out HSE SI operations under primary care for 2107 | no |
| Health | HSE Primary Care Division Operational Plan | HSE | Sets out key priorities and volume of primary care, SI, and palliative care services to be provided in 2017, also sets out budgets and indicators to be used to measure. | 2017 |  | acknowledges "groups within the population carry disproportionate burden of … ill-health and disability, with consequent high health service utilisation and health and social care costs", says HSE SI measures are important to counter this | no |
| Health | HSE Social Care Division Operational Plan | HSE | Sets out type and volume of health and personal social services to be provided by HSE in 2017; specifically looking at disabilities, nursing homes and elderly care. | 2017 |  | mentions funding inclusion initiatives for people moving from residential to community disability settings | no |
| Health | HSE Mental Health Division Operational Plan | HSE | Sets out type and volume of mental health services to be provided by HSE in 2017. | 2017 |  | speaks about collaboration with HSE SI to facilitate mental health initiatives with homeless and Travellers | no |
| Health | HSE Health and Wellbeing Division Operational Plan | HSE | Details plans for implementation of Healthy Ireland Framework, and to strengthen cross-sectoral partnerships for addressing health inequalities. | 2017 |  | mentions focus on helping people to stay healthy and reducing health inequalities, includes finding ways of addressing broader determinants of health | no |
| Health | Service User Involvement and Primary Care - Framework | HSE | Sets out reasons to include service user voices in planning health services. | 2011 |  | mentions HSE SI as one of stakeholders driving this policy | no |
| Health | National Drug Rehabilitation Framework Document | HSE | Framework for service providers to ensure individuals affected by drug misuse are offered range of integrated solutions tailored to their needs and create an individual rehabilitation pathway. | 2010 |  | published by HSE SI office for the National Drugs Rehabilitation Implementation Committee | no |
| Youth & Children | Better Outcomes, Brighter Futures - The National Policy Framework for Children and Young People | Children & Youth Affairs | Sets out plans to (1) support parents, (2) provide earlier intervention and prevention where needed, (3) foster a culture that listens to and involves children and young people, (4) provide high quality services that are outcomes-driven, effective, efficient and trusted, (5) manage effective transitions to adult services, (6) have a cross-government and interagency approach with collaboration and coordination. | 2015 | 2014-2020 | sets out that the framework is attempting to improve SI of young people, notes education of young people from SE groups is crucial, mentions child poverty | yes |
| Youth & Children | National Youth Strategy | Children & Youth Affairs | Details ways to enhance contribution of policies, programmes and services to improve outcomes for young people; evidence informed and outcomes focused, takes account of social and economic factors, informed by national and European policy, as well as by national consultation with young people. | 2015 | 2015-2020 | refers to EU youth policies that push for SI initiatives e.g. EU Strategy for Youth, talks about tacking child poverty as mentioned in NAP SI | yes |
| Youth & Children | National Strategy on Children and Young People's Participation in Decision-Making | Children & Youth Affairs | Aims to ensure children and young people have voice in their everyday lives; primarily aimed at children under 18, but also young people up to 24, strategy influenced by United Nations Convention on the Rights of the Child (UNCRC) and EU Charter of Fundamental Rights. | 2015 | 2015-2020 | sets out that active participation in decisions can foster SI, references consultations carried out with young people on SI topics | yes |
| Youth & Children | Children and Young People’s Services Committees | Children & Youth Affairs, TUSLA | County-level committees that bring together main statutory, community and voluntary services for children, provide forum for co-ordination of activities to ensure accessible services, aim is to realise outcomes set described in Better Outcomes, Brighter Futures framework. |  |  |  | n/a |
| General | A Programme for a Partnership Government | Taoiseach | Sets out plans for coalition govt. agreed following election Feb 2016; seeks to build "strong economy and to deliver a fair society, so that communities thrive, throughout both urban and rural Ireland". | 2016 |  | mentions development of new Integrated Framework for SI which will outline measures to help eliminate "discrimination on grounds of gender, age, family status, marital status, sexual orientation, race, disability, religion or membership of the Traveller Community", mentions SICAP | no |
| General | National Reform Programme | Taoiseach | Part of European Semester process [annual post-recession monitoring scheme of economic and fiscal policy at EU level], coordinated by Dept Taoiseach with input from relevant Departments and agencies, provides overview of structural reforms and actions underway, also reports on progress towards national targets under Europe 2020 objectives on employment, research and development, climate change and energy, education and SI. | 2017 |  | mentions NAP inclusion being updated, SICAP, SI Monitor & poverty reduction | yes |
| Education | Action Plan for Education 2017 | Education & Skills | Outlines actions to be implemented by Dept, its agencies and others across government, has timelines and responsibilities assigned, will see quarterly progress reports published. | 2017 |  | mentions Dept of Education Action Plan for SI under development, also says education to be used to break down barriers for excluded groups and setting benchmark for SI | no |
| Education | National Strategy for Higher Education to 2030 | Education & Skills | Sets out vision of higher education sector that can meet the many social, economic and cultural challenges facing country over the coming decades, and meet key roles of teaching and learning, research, scholarship, and engagement with wider society. | 2011 |  | explains that reform of this sector is essential in order to support equity of access to higher education and to wider SI goals | no |
| Education | Delivering Equality of Opportunity in Schools (DEIS) Plan 2017 | Education & Skills | Goals to (1) implement robust assessment framework for identification of schools in deprived areas and effective resource allocation, (2) improve learning experience and outcomes of pupils in DEIS schools, (3) improve capacity of schools to engage, plan and deploy resources, (4) support and foster best practice in schools, (5) support work of schools by providing the information and feedback to achieve goals of the plan. | 2017 |  | vision for future intervention in SI education policy and for education to become pathway to better opportunities for those in communities at risk of disadvantage and SE, refers to SICAP and SI unit in Dept Education | yes |
| Education | National Skills Strategy 2025 | Education & Skills | Identifies Ireland’s current skills profile, provides strategic vision and specific objectives for future skills requirements, and sets out road map for how the vision and objectives can be achieved. | 2016 |  | refers to DEIS programme, talks about education being tool for SI of children from disadvantaged backgrounds | no |
| Education | National Plan for Equity of Access to Higher Education | Education & Skills, Higher Education Authority | Vision to ensure the student body entering, participating in and completing higher education at all levels reflect diversity and social mix of Ireland’s population. | 2015 | 2015-2019 | sets out that SI may be achieved by ensuring higher education is representative of whole society, sets out basic principles of higher education include equality and SI, refers specifically to DEIS programme, students with disabilities and young people who experience social disadvantage | yes |
| Housing & Community | Rebuilding Ireland - An Action Plan for Housing and Homelessness | Government of Ireland | Sets out plans for key housing objectives as set out in Programme for Partnership Government; (1) to significantly increase supply of social housing, (2) double output of overall housing from current levels to at least 25,000 per annum by 2020, (3) to service all tenure types, and (4) to tackle homelessness in comprehensive manner. | 2016 |  | homelessness is a major focus, refers to SICAP in relation to urban renewal, also refers to regeneration programmes aimed at "the country’s most disadvantaged communities, including those defined by the most extreme SE, unemployment and antisocial behaviour, through the provision of a holistic programme of physical, social and economic regeneration." | no |
| Housing & Community | Action Plan to Address Homelessness | Environment, Community & Local Government | Report on action points from Special Summit on Homelessness attended by representatives from govt, state agencies, Dublin local authorities, NGO sector, the church and political representatives from Dáil and Dublin City Council. | 2014 |  | actions to counter SE in homeless crisis | no |
| Housing & Community | Social Housing Strategy 2020 - Support, Supply, Reform | Environment, Community & Local Government | Sets out national social housing policy with three main aims: affordability, sustainability (economic, social and environmental) and inclusion. | 2014 |  | SI is stated as an aim of the policy | no |
| Housing & Community | Our Communities - A framework policy for local and community development in Ireland | Housing, Planning, Community & Local Government | Sets out plans for collaborative and participative approach to local and community development, and creation and implementation of future policies and programmes will be carried out by government in line with the Frameworks five core objectives. | 2015 |  | SI is one of the 'core sets of values' of the plan, mentions SI important for "communities experiencing social or economic disadvantage, including rural isolation", and mentions that local and community development can help “tackling poverty, disadvantage and SE, supporting the capacity of local communities to improve quality of life” | yes |
| Housing & Community | Our Sustainable Future - Framework for Sustainable Development in Ireland | Government of Ireland | Discusses actions to promote clean energy, sustainable approaches to agriculture and transport, and conservation and management of natural resources, identifies cross-sectoral, whole-of-Government approach needed to achieve aims. | 2012 |  | SI is seen as a principle for sustainable development, then links 'sustainable communities and spatial planning', also mentions SI with poverty, migration and housing | yes |
| Housing & Community | Social Inclusion Community Activation Programme (SICAP) | Rural and Community Development | Funding programme that aims to tackle poverty, SE and long-term unemployment through local engagement and partnerships between disadvantaged individuals, community organisations and public sector agencies. | 2015 |  | see box | n/a |
| Housing & Community | Local Community Development Committees (LCDC) |  | Set up by each local authority to develop, co-ordinate and implement coherent and integrated approach to local and community development. | 2014 |  | See example at link; focus on SI and community development | n/a |
| Housing & Community | Public Participation Network (PPN) |  | Forum for public to engage with city and county council (local government), set up in each local authority area and made up of organisations from the community and voluntary, SI and environment sectors. | 2014 |  | See example at link; includes CSOs working for SI | n/a |
| Rural Issues | Realising Our Rural Potential - Action Plan for Rural Development | Government of Ireland | Sets out objectives to (1) support sustainable rural communities, (2) support enterprise and employment, (3) maximise rural tourism and recreation potential, (3) foster culture and creativity in rural communities, and (4) improve rural infrastructure and connectivity. | 2017 |  | Links plan to SICAP activities, mentions community development for SI | no |
| Rural Issues | Rural Development Programme (RDP) | Agriculture, Food and the Marine | RDP is part of EU Common Agricultural Policy (CAP) [set of objectives, principles and rules that support European agriculture], the CAP framework has two pillars: (1) direct payments to farmers, and (2) rural development measures | 2017 | 2014-2020 | Refers to promoting SI, poverty reduction and economic development in rural areas, and describes initiatives that carry this out | no |
| Rural Issues | EU Rural Development Programme (LEADER) | Culture, Heritage and Gaeltacht | Provides funding for rural development projects under three themes: (1) economic development and job creation, (2) SI, and (3) rural environment, funded by EU CAP | 2014 | 2014-2020 | SI is key theme of programme and relevant projects will be funded | n/a |
| Rural Issues | Rural Transport Programme | Transport, Tourism and Sport & National Transport Authority | Provide quality nationwide community based public transport system in rural Ireland which responds to local needs |  |  | Provides transport to rural communities, promoting SI | n/a |
